# Supplementary material for: A blood-based multi-omic landscape for the molecular characterization of kidney stone disease
Source: Royal Society of Chemistry journal article supplement (doi:10.1039/d3mo00261f), 2024-04-16
Supplement: d3mo00261f1.pdf [file d3mo00261f1.pdf]

## Support Information

### A blood-based multi-omic landscape for the molecular characterization of Kidney Stone Disease

Weibing Pan<sup>‡1</sup>, Tianwei Yun<sup>1</sup>, Xin Ouyang<sup>2</sup>, Zhijun Ruan<sup>3</sup>, Tuanjie Zhang<sup>3</sup>, Yuhao An<sup>3\*</sup>, Rui Wang<sup>3\*</sup>, Peng Zhu<sup>2\*</sup>

\*Correspondence: Yuhao An      Email: anyh@szbl.ac.cn  
\*Correspondence: Rui Wang      Email: wangrui@szbl.ac.cn  
\*Correspondence: Peng Zhu      Email: gdszpsrmyy@163.com

1. Department of Urology, Shenzhen Pingshan People's Hospital, Shenzhen, Guangdong, 518118, China.
2. Department of Laboratory Medicine, Shenzhen Pingshan People's Hospital, Shenzhen, Guangdong, 518118, China.
3. Pingshan Translational Medicine Center, Shenzhen Bay Laboratory, Shenzhen, Guangdong, 518020, China.

#### **\*Corresponding authors:**

Yuhao An  
Shenzhen Bay Laboratory, Pingshan translational medicine center, Shenzhen, CN 518118  
Email: anyh@szbl.ac.cn

Rui Wang  
Shenzhen Bay Laboratory, Pingshan translational medicine center, Shenzhen, CN 518118  
Email: wangrui@szbl.ac.cn

Peng Zhu  
Department of Laboratory Medicine, Shenzhen Pingshan People's Hospital, Shenzhen, CN 518020  
Email: gdszpsrmyy@163.com

# Supplementary Figures

A

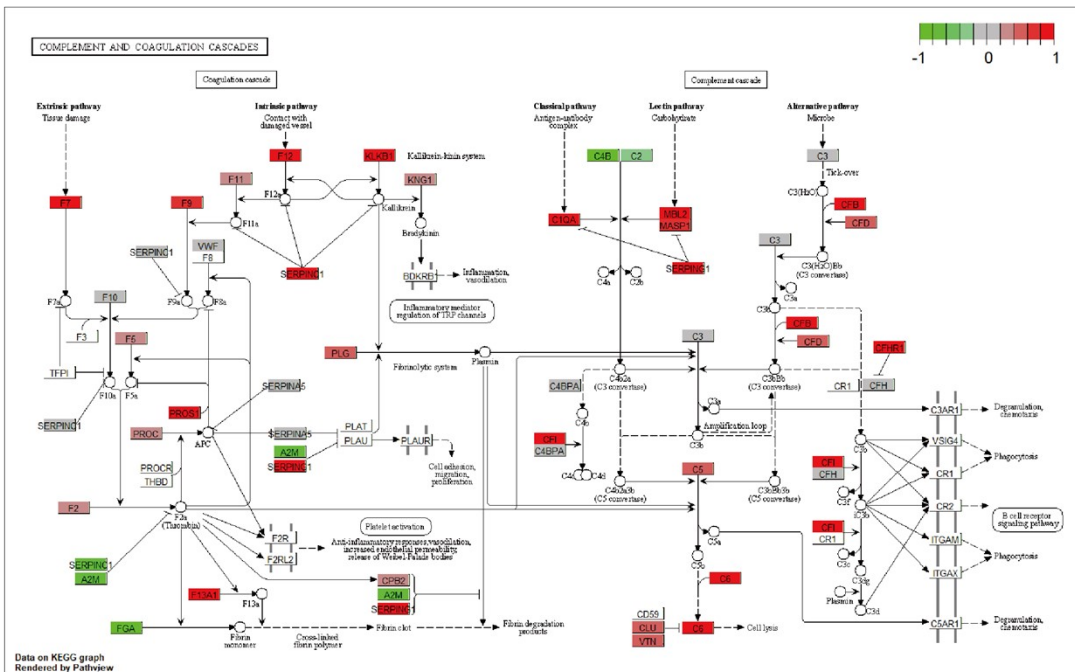

B

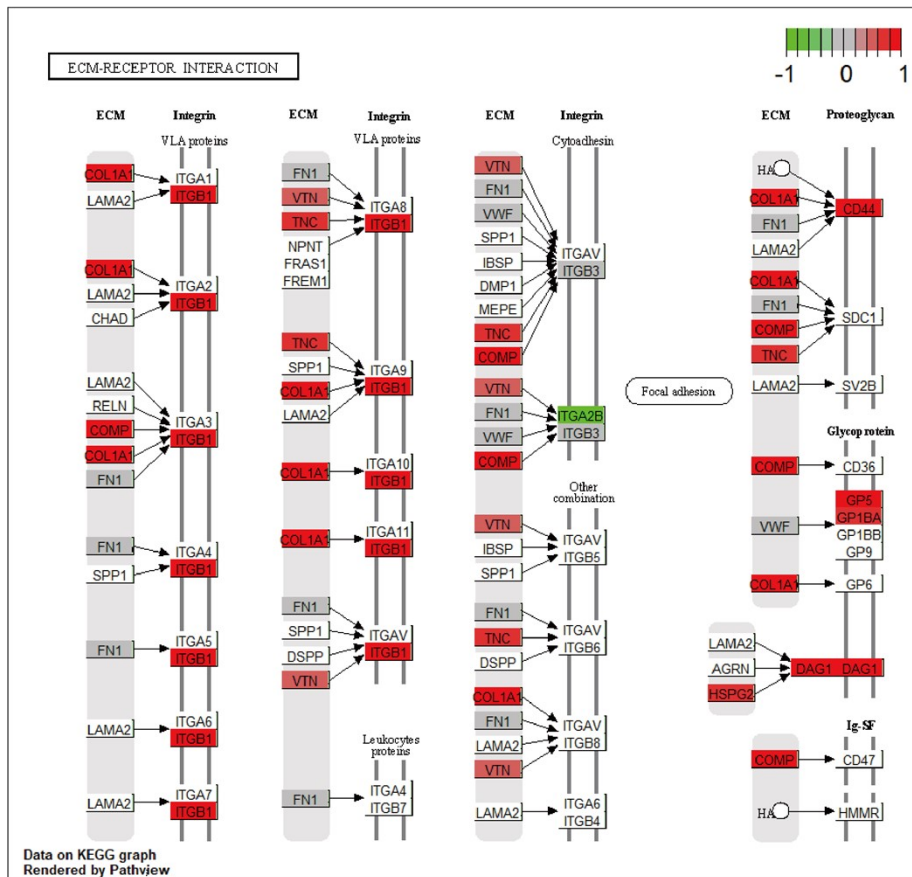

C

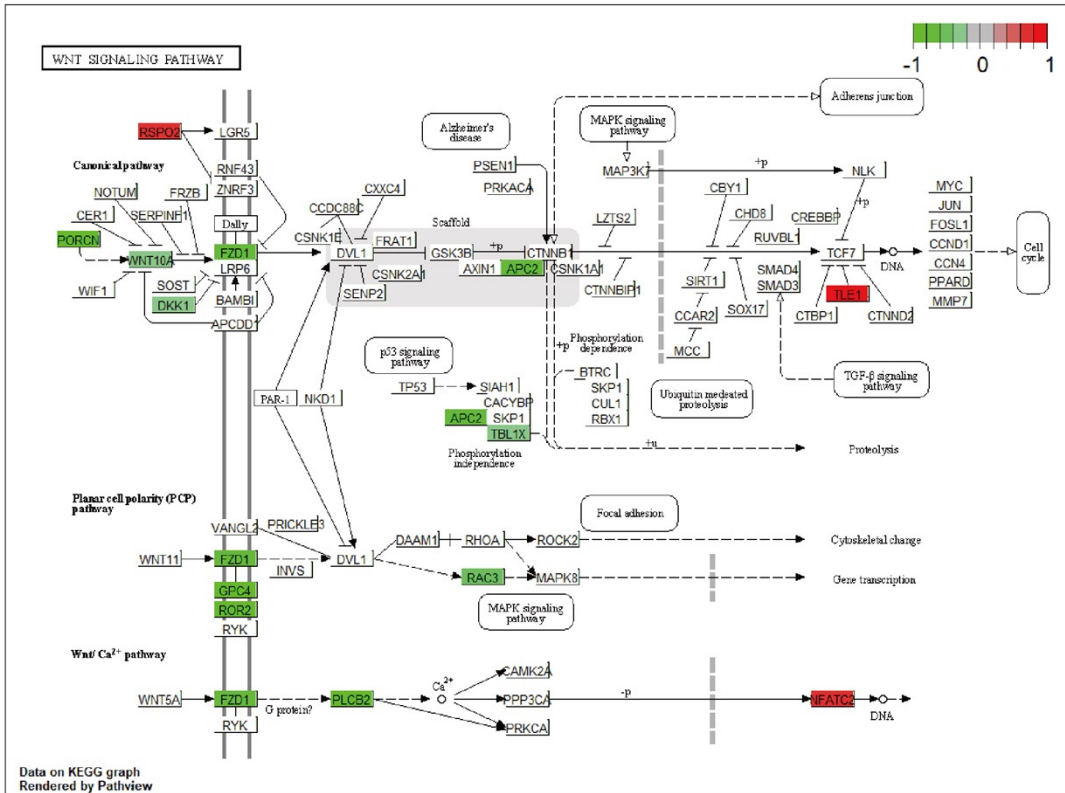

D

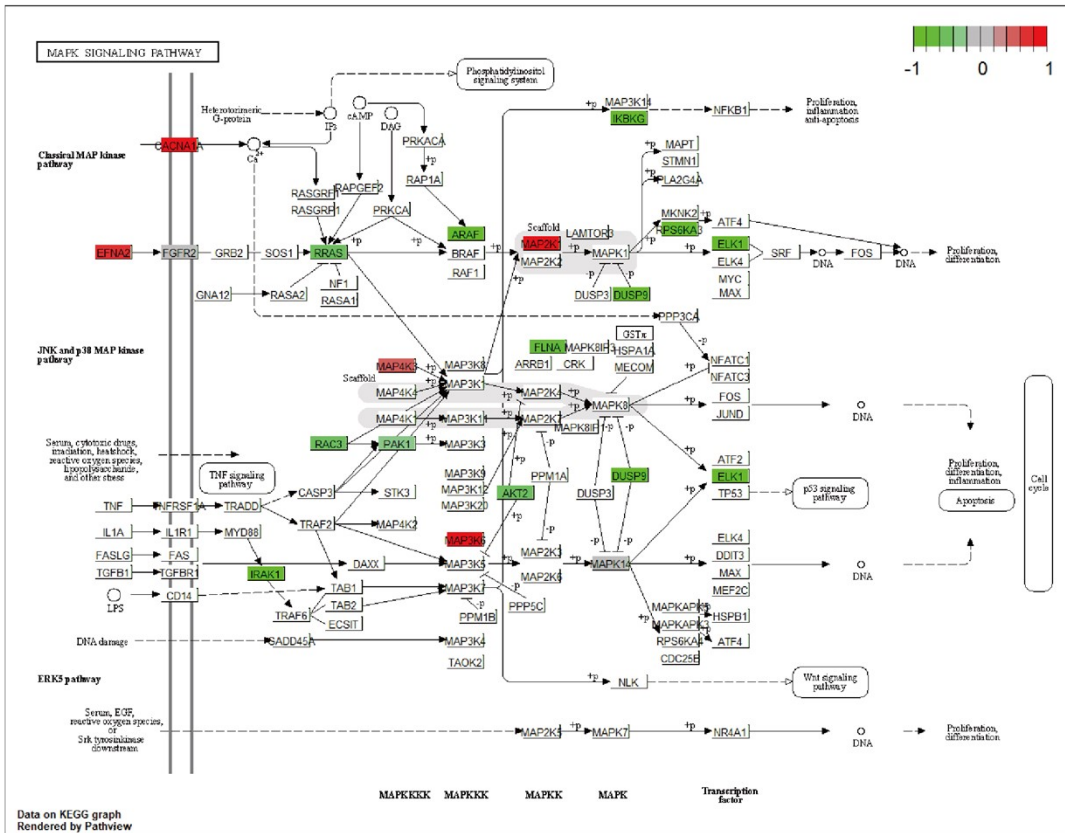

**Figure S1 A.** The proteins changed in the “MAPK signaling pathway”. **B.** The RNAs changed in the “MAPK signaling pathway”. **C.** The proteins changed in the “WNT signaling pathway”. **D.** The RNAs changed in the “WNT signaling pathway”.
